# Supplementary material for: Strength of electronic decoupling of fullerene on an AuSiX layer formed on Au(111)
Source: Royal Society of Chemistry journal article supplement (doi:10.1039/d0cp05764a), 2021-01-01
Supplement: d0cp05764a1.pdf [file d0cp05764a1.pdf]

## Supplementary Materials for

# Strength of Electronic Decoupling of Fullerene on an AuSi<sub>x</sub> Layer formed on Au(111)

*Kewei Sun<sup>a</sup> and Shigeki Kawai<sup>\*a,b</sup>*

*<sup>a</sup>Research Center for Advanced Measurement and Characterization, National Institute for Materials  
Science, 1-2-1 Sengen, Tsukuba, Ibaraki 305-0047, Japan*

*<sup>b</sup>Graduate School of Pure and Applied Sciences, University of Tsukuba, Tsukuba 305-8571, Japan*

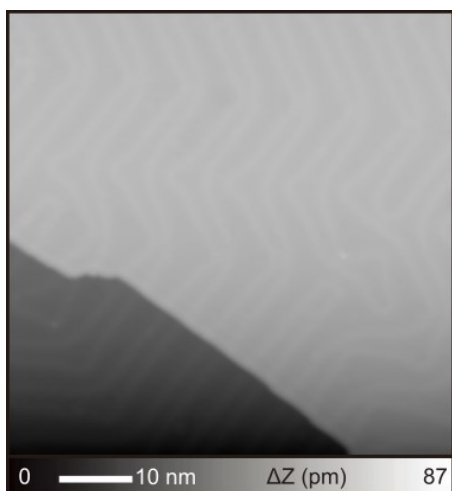

Figure S1 STM topography of an atomically clean Au(111) surface after cyclic Ar<sup>+</sup> sputtering for 10 min and annealing at 750 K for 15 min. This image was taken before depositing molecules. Measurement parameters:  $V = 200$  mV and  $I = 10$  pA.

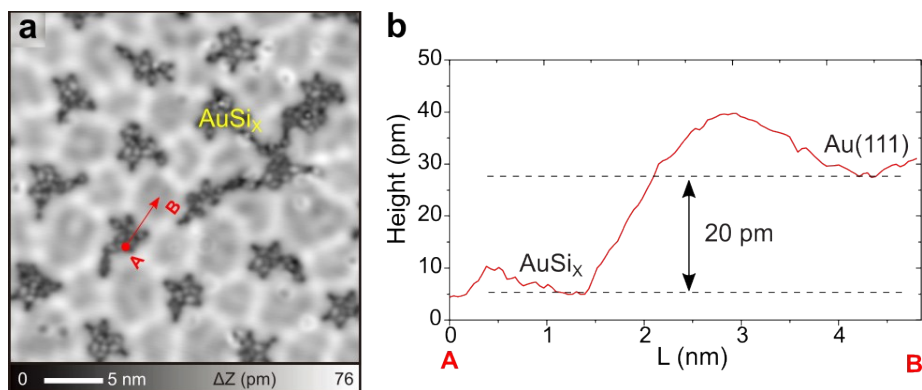

Figure S2 (a) STM topography of AuSi<sub>x</sub> partially-covered on Au(111). Measurement parameters:  $V = 100$  mV and  $I = 20$  pA. (b) Line-profile taken along A and B in a.

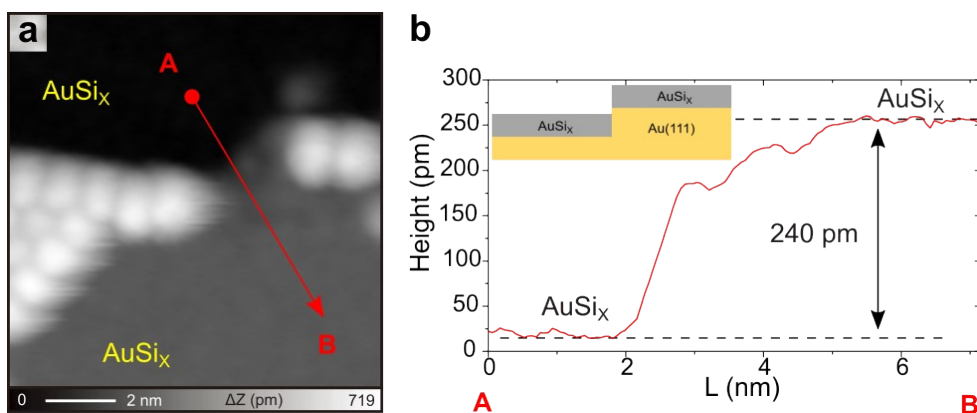

Figure S3 (a) STM topography of the terrace of AuSi<sub>x</sub> layer with fullerene molecules. (b) A line-profile taken along the red line AB in (a). The apparent height of step is 240 pm, which is close to the step height of Au(111). Insert is the scheme of the terrace of AuSi<sub>x</sub> layer.

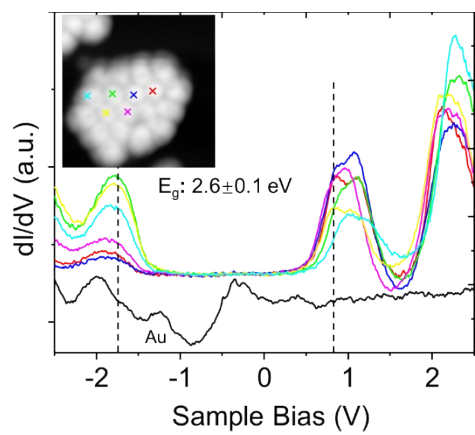

Figure S4 Six  $dI/dV$  curves taken above different  $C_{60}$  molecules on Au(111).
